# Supplementary material for: Automatic Benchmark Generation Framework for Malware Detection
Source: Hindawi journal article supplement (doi:10.1155/2018/4947695), 2018-09-06
Supplement: f1 [file 4947695.f1.pdf]

## Benchmark List for Malware Detection

This benchmark list is free for malware research. If you need binary files, you could contact me through [lggray@gmail.com](mailto:lggray@gmail.com).

f269474be50c47e7f89a8d52e69bc480  
f4635ca9748c8ec896f15e0e66e90c7c  
f43b9510d31b38d4e36e1ffec2474070  
f3e147fcc6263a4e7d03f13bc814d1b7  
f323e612eccba68c0959e80fa014b899  
f3a85652d693e5ff4ceb7fd4f0102cc0  
f3e0677ad4ce029602ff8860d02c85f8  
f4a74f5c337b7b2aaae5d5e2367b0  
f26b200dc735017c9ac0ba01055011c0  
f3e83fa25aecbf0952d72e3f692da669  
f496529cf2c672fe98f7d952f10b8d20  
f484bd955cc1acb0dce893f1a37b4d69  
f42240bb1a5ae0bf4a0cc088a8f66ee0  
f3b3dbc561918e723636103eb77d807f  
f39b6874f57bac5cfacc935884b64750  
f3f71d69d51ea9127bcf940882e99080  
f48a8d197924b9dc76f6149ed869c9e2  
f43d71565c2c70430f39314faae58330  
f3e4edf96d2843c1531297819d23cec8  
f462c1c3e23c9fd0a03a39af66407800  
f3bf67630635512b6308f9abffaa989a  
f3b4eed31b746d52d54f8c5b18f81a70  
f46a14aa817e73b5fc7f6d9124314450  
f2d447bc278ad1de2b44a7c24bde5d4e  
f49a6cf6e7dab646a7e6727c92e68e03  
f42db970fac4d2542093ea85aeda79a1  
f45e17feb3e9698b286109a615c8ece2  
f43d06b6605d534b1579c2e0561f82a0  
f47a226d206d99296f3643d944c25860  
f42b61943038bf450aedfa29d5f384a3  
f42d0feea5c227d6a677e16502f3dc7a  
f2893efffb4c778f6b9c2e2ae3091de5  
f48f08eebd1aa135881139b4480cd348  
f4815bda7af5361f5cd6d2e15dfbaf77  
f452bfbd1b2adb6fe8fd365a91441b30  
f448156e65cc4350c77ae031b5734973  
f4099a16938e828af34ad21bed11eea8  
f44a08c939aa148d355e451a7cc04c00

f4656f061db9c1a7da9f29566ce65e3d  
00715ededd5430a1d4d5f8c0701b746c  
f3aa059c23a2080bc0b219eebf5577e0  
f3ed4c027bd534976e9510b3406ebc50  
f442ea43ef57cebbb1fc3a6cb4344400  
f3e91e54462b14cc8cd0c87c123b24d0  
f3b08f5619fd4e27e2118e76ab929f51  
f3de886ab22dcf4d6470051ddb6e7580  
f2f72360bada04cb04a148334fb9b4f0  
f3fd057123b2980d925101123d0668d0  
f3d93a1cc62dbf2945ca2aa6a12aa90  
f401e2df033909bbfc7a107aedd376f7  
f495ae9cf62f99f31aac7339a6918920  
f30868fec235fafcc1b802aca52ff6df  
f2d1119c15f2b3d10999aceb138952c8  
f3006eabe829598b9701eae12b240adb  
f36febff0935a4c49d6a09bc66671ab02  
f3cddc53686141eb01413d6c20934590  
f3bd84e4666415971ffd64029273cb80  
f27e4204fee8c481586656ce0531e287  
f45abb8730b92707c023be21abe521fb  
f4425cba6e6a4d97e20853e3d5c67a99  
f44b22832522e0c77fe08002c1b1ce60  
f45446deb80690ab0b4642e2fe9f4ae7  
f42f9f0e73a0ee6234e1c36f897f0f20  
f44256ce457ff3b5be1a661f8048a7f0  
f24d103667ed0f98c8e1c625211e9970  
f47350e53c9cb691e3bfe723600ddbb0  
f3e03a62654096c5171960840d77d4c0  
f47b220585965bd871a93de869719a75  
f3735ce34d1dca15e01f9912f4647bdb  
f2fb188156cde35ae58deac95573f28a  
f472efaf4fa24b42ac85f0f8003b4770  
f44a7fa590a40adda81d37b0d68b4c20  
f48418db23524de01f120ae98b25adf0  
f349f5fcedcf8375f830adf4b16ac7f0  
f49294e03601725a20af231d262f6c30  
f36dd268e6e72a00b998e2bbf95f8448  
f4a586b11f4d310373673f6e9d292eaa  
f3f9c6bda5beee695e7dae57947da0f8  
f400cd47bd21395948f36b1515606db3  
f26664fa6ec5096480522f9f6cfce5bb  
f3bd7ae7254d1c916ce9ea4d49e1fbcd  
f3b331482fea7a8bb0750036f42b2136

f2c212f7a575175de0ce9e882608ac93  
f3aa6cb25a372192410160dff7eb8eb6  
f36df67e407969ccb08520e7ce306519  
f41a74507b83b3faeb77f3d76a7347b8  
f3afbb2a27cb4cd768ed9265ecf009e0  
f438bb848aeb93ebe754affdfc7c01b0  
f373b63b05b2b609c4e07a14db932e47  
f4aad2ba08ff411be9813b76d33ae880  
f3f1d305a2f41fba75681aa294340edb  
f2b96a283dafe6b808555018a23157c0  
f436bb49f348d78647576ad15900bf0c  
f3e30699844d8f5f8abd07a066099172  
f48d0dfa48adb9996a71e9c259a10040  
f23de8fd5ad5fc90aa952b98f4764d10  
f3a7d4ea3f34d5150631ce3f795f5d88  
f3f46b1f53a62b77236950cbdad3f3a0  
f23a3c36a6ce0161bf0ffb7d9e88d460  
f4982552982834ee4c00ecea1a58a747  
f40c3adad53403e7aadff0f6c320be00  
f3c4482f86192fc2630b600c16c45a50  
f4a079a30117d6f14ede56db8c0b6020  
f44437857038d7ba4f39b3e5021ed200  
f3b1b38de4630d47735fbee62f40be70  
f43a583690b53f60d069939382becee0  
f2fba0e2db9c51d7f2a8c8d06a5ca570  
f3c9e7ba3d0a9c824687f8395d529ec0  
f422c69613fb22751c5a8284959e9c5e  
f3c6bd28ba18060c5db3c2b001616de0  
f3e956011f0a3b2ae263a6277fd0320e  
f3e45bd6f298484ff81815d2ffcd94d0  
f37b96b6ff95827d4b525d4c3529e67e  
f361c21d05b6a0bb0966d9833dd7b6b0  
f3fd55837d814c8fae55a8bf11d46f2  
f2bc698654ca14b8efa77c600fd5bdb0  
f26ddece8bf9a6da913a6e738e8730d0  
f37c943c40504f87eaa3a22f41361890  
f2e52e92e8f1a6f9113468b3f9485f70  
f470930d1392b6eef0809504020d4337  
f3e7c599a8df4064b34a11df56722a91  
f420b21109a91bad9d5e80a0b214c360  
f3376c958d261723099819cc4c8df100  
f357761b74800e8e90d465f21a6d3a6f  
f2b10b3baa6a868ad14685497acb98f0  
f2932b3cfc20f34fa3972e172b2afcd0

f44cb5408201c0d464f57c127144e620  
f3ab8adddce6730b1ee494e59ca88d70  
f3d2b60b6a809df038965ee84bc49cf0  
f480a2326ba111c7c130f07f97f179b0  
f4268c8ac32778ae5d8edd9870951487  
f3fdb35d4c77eafa6c73d3e10d6d36f0  
f39097b0ae3cb118e9e18d60675cf230  
f38bab58221c6c58a68d8ea865aee51d  
f474206c59c792a34d3f7caa7052cda0  
f44b03153dcc8b884c969cfc24aee0b0  
f476e8ed39fad9a3be7e265f97aeb004  
f3a6ab31986c928d312699dc7208a211  
f3b8e9c81342df3b2f7fd0b227d1fa30  
f49f72ef0b38390e1e9e7fc1d53ceca0  
f3cac3a1e381b63afe729346371cf9c0  
f3ab21c7ec7f8f0e0693c6cb610fa289  
f3ccf763bb86b8f4e7ae13bbf2be3ebd  
f414719e04c3d0a30301e84ff87f3580  
f4165c443bb9d5026d5c749a5a40a760  
f4776a201e10464fda4e9c7ebad26050  
f3f03e1c51f85d71c6b5ec0a3a2ec830  
f3efa05ac757cf1ba658ff2c4d8c5720  
f3e2ecb6d64f0bb731e1ef88ac564c74  
f284bf0445f24e6af3958d597e750c80  
f2bf94f06f9eb05c5dd4cbd4ea70cd2f  
f3ecd1cc48d41d5140962174dc26d590  
f3bd682677f42bb2ad81d1344953f006  
f3379258aa09db706b247c59bc250da0  
f2984431eabd862c6635be56e6fa3440  
f44c43c85a8b0af2aba6a91097ab5ea0  
f496ce172fe68043dfaf69ee5f773b45  
f412e339e5a65b6b5aa3c833de8840d8  
f405e99fed1bbc26919bf2afd8333ed4  
f46c6c651f30d5dc6a1e9aa6c838c607  
f40393e302d0723f3ae5754bb6edce02  
f48acc4ac2463b000e8d9d7d1fbab950  
f4247958ae81c3c862beb1ef669ba9cb  
f3a8ba5f872eba950dd2f95739ccd830  
f4797eba6b215448689dfde46ce819d0  
f49ff2c6f4e2e222664b31602fa516a0  
f45624b93eaf0fec24e6ae0422f8f2d0  
f4933093e0388a602e0f9020991735b0  
f2f6476908b9e7615989a5ef9cb32fcf  
f47d7feee59645e5a0474df8409e5c20

f3a79801557cf693c70825d54e97aef2  
f421c0793caa7da2a2d5f11d97a24960  
f2b524376e24e5f3adf01a656a0ea020  
f32a24f9756f1baccdd54bbdd07be97e0  
f3625813d732d9f61f3f4ef5228915a7  
f25bb7ed2354da69e1ff92730df6565e  
f4231a2039b030a4c5ab053d24516130  
f470d1f30eade85583cca8d324213e23  
f3b6adc27c9fe9f9081254f85c9b7696  
f4085ad42a311eec23a0574e381ce3ad  
f466bde25d922cb7a3a417b8ad20a190  
f436edcfae462eb159420cdd33cd04c0  
f3c68eb51119fabbb0538b3ab6711c43  
f303767e8c7fb2c84c84b8978730a230  
f4718051ddf3823dfc048900b6257ec1  
f3ed6b58e84166de248d85b42a1c645e  
f3e817888955de632275fb8029359660  
f472d71e2c90d1b49af31bf57929b497  
d1b110bffbdfbac7017928f767e57468  
f480e4367aa457ab2f94ad6a0c4a2620  
f3eede535208bc1825f33180a21a3e00  
f3db6c924d2c87ccea75786f7087f730  
f418cf168a9656de1250f57560807920  
f3bbc555c3f30c8c13ec0ca00001b7f0  
f4913cc767936aa83b479da645646a71  
f3d1f49842aea9a85b4671b3d19639d0  
f3e7efbe01972feaaa6ad94d92f2bbc9  
f41c20d2e0b7493839f6fabe99111790  
f3b667d60f306b9e2be15a0ef640e150  
f4a2f1977db75691bdc0741cf24a0fc0  
f434bb5343454e1b26d54e12c6f4982d  
f4252c3e652aba35ca8a3b4350f391ea  
f24b08a6864884864bcef1dbe98fd7a5  
f41281ba0db9e75d1e86030dc4ec71c0  
f44a66f4ce2860d70eac7edc61d186ae  
f447b626bc3b81c339a918dfac0e3ad0  
f45fe84e962d97f53ddf74c6447557f6  
f3b618bb07a099fa7b31199b7c71522a  
f41ffd5e13a0a276f4fe5bca203b83d4  
f419e7187a9cefe2bd7aa133ccd7eb00  
f416149394633d329102510ebe1f713a  
f49b7f7d560d37241665a19838f52fd8  
f453fc62915acf66317152b58c0b2a30  
f3af67aa0b5a699a2120815c8a3947a0

f3ea7f0f1d4a10528d1249600ebdd7d0  
f4af4a7b3e560252e741edbe2b4c64a0  
f4ab92a02bea833792e26f413255f34e  
f42c4db80a059e9e0fbfe120b05d8072  
f45e8d37739478f68630ec298c35ea6c  
f3c707c487c8cd72b720600e2747f4e8  
f4562ea6ab981aa85c3cd099c95e56a5  
f2c8364feb7ab88d57006be730fbe8ff  
f45ebe5859c58daf51b52658e6f7ffd5  
f40b9672b8b07f017e94c283354c173e  
f478138213bd3cc6d9983c4058c2675f  
f40e958e076121c54e1172a72d26fbac  
f4410e8f3e092155c121a2e42dfb8ff0  
f42da3f314a40bc06171aaf365104fcb  
f3ff16f7fa4b048374e06a33e29a3068  
f4951a9ff1f05c0f1988b67d773d42d0  
f4aae39cfd53fc947772a1fd90e0a0e0  
f3c15a277d99c913e23f164af50e9e20  
f3b7187557e1207dcb280b503dddc6a0  
f4b01c6a0331cadd97ba482d8db546b1  
f3b011b753a6f39508a6428d0b3bfc6f  
f480b434b0b7a94aef2c35ccd40f90f0  
f3b25b943c7f025e4f70f8cc973a8eb0  
f3ccf2446b8a89fdfaf7a77757fd1490  
f4b04a9560d3e4bb7965927e35358dc0  
f3bebeca0b40f78f687dd45ec2baff450  
f434286193f7e0c4153729c092f561b3  
f42199b10ade242acfce6b6491c9cb2c  
f3dfdfc104f9d26daaa71767925ca03b  
64816e716c59ffa5ea6c08df68d69887  
f27a38f2f5a46f701a35883c0aa1c37b  
f478034d8baf5dc6d8a123c51e8cc050  
f3e482897a6a1616209eef14bcee6912  
f3bc60cf8b7296e7633f9281023dd74a  
f4014b1c7b727439de9a1c531a1633c8  
f27227ce820c67b99fb9aef63ce49a81  
f3188f8857ba17fa59c94a012c8f612b  
f4858d7820a1fe51e53e914120580948  
f47ea9a9a16733bf440db68307db1470  
f4abecbd05b2d5729ea55f723813f2b8  
f27811223b4a08882974f212b38eeb5f  
f49e57c2fc07387ebeaf054c38539de0  
f3ba33bf7bfe8d47331eadaa0d8161df  
f4add5e10d0a22bea5f96f374864f1a0

f44a3a9831f19e2c379a524b7ff48350  
f463050e84a840511d26c69caaf43b3b  
f3fc7cc8085c9337f430e0f0ea269e2f  
f3d15d6171ede2ab034def5d25aa1050  
f46c2def6408f9f2591e427f0e27bf60  
f3afcee4276cf960bd864f7f4e266493  
f476dc5e68c4ea18d5c205314bbed0c9  
f253c3d14b319ca7e75276cb121e9900  
f3c78c3fbcf0f4990206fba522f193d0  
f428202aaf6d9219b5d593f4f19f9fe0  
f22240c0914b33dbc97e2ebf041c5b9b  
f32977f08f8f034cf3940281c5e86e7d  
f410e4baf9c2e8a389a2cbfa09d96fee  
f24870be97be4ba6eaf23619d008eed7  
f301c70bacf278fe38dec28873597bb0  
f3e8c55f4a01906d62921d22f181670a  
f25a13b7c356fa70ae1947d7f4ef0610  
f2abba45ab1db8ec15aa9dfcc66bfc63  
f3f286549454554b9a25a8a6833e7c30  
f436bbaf1df809fae8bf82eb8588a979  
f33b8c34ef4f1e80b2e6995e7d9b16b0  
f4aedfd2bed9905e4c8906cbd5357b00  
f45727e951839c95861f554ca12a3a70  
f3b0b49a2837f0f75ee98b64f7cd5f40  
f25730bfa52d36e9cdbeef13b25f8140  
f49c201e244f008abe80098f1c4c867e  
f24cae5f15cac3bc3c1544263d2a3e50  
f48fc53c27cc46770c82adf075b07e53  
f40e579440af198553689cc824a8624c  
f496cc5cad44b07a76900648a13cb888  
f4558208766d06997023fa6d3798aa5a  
f44a3d140935a9db7f677438b6d0bd8d  
f3c665aelfd7379b09fefef2a1bc5020  
f44af4e6547d73c8ea3dba08a7d6e810  
f3aa2b2cdfb3a3ece22357cb91c08600  
f3d641ae7c85d5928abb7e49b3f11f66  
f4b0d13b05e77393420f8f78c27fc9b0  
f41be2be5434b7bddc71af656b81a16  
f3f39941f2f6d06f17c66d212f89dd3d  
f40cf8750ee11ed716f7f17bf039e05f  
f31f6e425085311acc8d9a68ad3c61f0  
f3dbb68633899551a24ce8866ba04224  
f2214a5a2565ce7c8c1610c4121eff6b  
f492eb4ce67091e15dbcd55bf93b6a22

f47f49ab6acdae2621d532ef3499f903  
f4a0632a82ad96d60b095e16a90dbb00  
f41c1758a710389e1a5a8e4fcalfd918  
f418c4db73780f2681ac42a9dac6982a  
f22794ba75e22e88fd0c942ef9b5832f  
f4901a8e9861cd622e02c5a45a210921  
f49a2bb71abfbfbb2820bafefdf2dfaa  
f41f076bfd373dc042b4b2c87a9a4cf1  
f2ef19ed1fa8f43f881ef49b6ef8a6d4  
f406cf4d6942bc1e7f112d3267358fdf  
f438e2abc9d8b6fa5014245f1412994  
f4944f1cd100c906f3882b5d5d2e365f  
f2c28f44708941bac4d23308f2b71a1f  
f232a6ce4b9df7c6add5f461e5c01d20  
f3c777bac9d45a183a88a67c9f0b5b85  
f3c5640e111333cd21fa760b2c41322b  
f45e23f44e1bd58c9634706104f5de10  
f3c6cf98842b9a6e533bdbbec2530f11  
f479839c3beaf714653083d01c69baf0  
f4529e75b072fb299f7aea8465fae81a  
f3eda3fea54407a71f7aa4e1095df260  
f3b61a7335049c195e8605633fcf314f  
f3592e786b88115f79bc821f7f80573e  
f3d195124a9ebab07a63d08b4a397938  
f44db7e6556694a8f8f541ccfccc3c10  
f23e03e1e23d5f38b9df8bdb89136563  
f3570f3a5b8e86aaf58a5f5888bb1ce1  
f3b024c0264282fda594c4be2d760b62  
f31c0e1a30e442b28655dcc39afaa2ed  
f418d484ab7fcc97b3f0dd147363357d  
f4142357f7ac552b09b064c116a077f0  
f3bf52cd691473a1d748877674589ba4  
f480fce5bd73203c613182c5320df3d6  
f4167eaf7bc54d8b81d97d0311e7f940  
f2a556ae0d34f732663b4bc35ffa1020  
f444bee66090ac34e057a0db3a75eb46  
f46be624bf5676ee22dfbf931ebbc51  
f383f7142ac72e311d386807c01d04d6  
f23e529a205ebc85f210d7dcaa7360e0  
f3c56564cead36e01e4e2342c001846b  
f2953669c6a76ed5f80e777670d22b6e  
f3ff3c8b648203f2e30279800a15dbfc  
f49d455ecff10f58f3e497f9aea51ba0  
f41e610488ec4c3a5a8d8ab8a5ca20e0



f4195225dc7003d18b0fd2b04568c3b1  
f4a4f5cb0b1e3f872738f53304c74df0  
f3fda33e066919245eedb52a9a045c99  
f40bcb9af57bab43abc1ccb10ac00662  
f413293e92d303a58cbb9bb29a7ff494  
f40c4eff82119bc79b615ffb2e3faa58  
f3631620d6fadac80c1d67607b39a930  
f3fae14f3370996546cba3cf938dfda0  
f43b1970cdce842787800019a7c22d10  
f425a7cf31c7277185ce4ff0b95c25a0  
f3c39f9b94834bc0de02d24198c41720  
f3b0404342f677438269f3e7caad1d10  
f42e7b53f5de7b95b305ee47e9299a80  
f3c6e5c72141b06f094a977122b13120  
f3695cac0e705337d946ca208506e804  
f33595b6cb889584cd1db231f063e94c  
f2ba84f5a0936011a3616c1e157cd913  
f455660f2ed893c07fca3a3d14c7ffe0  
f38349d93397a84cd22a8b1d4fc7bf50  
f43711b0e562f5b3fe569f1c5249e770  
f45c706feb60ca308d258a7fce02bb44  
f3ab6dfbd2d4e33475fb4cbee851a6ad  
f4034f9d5799682c67587aeb14814e80  
f2d0e9c1ef96c79b6375bda75de9a800  
f3e0e3bede9e246e4a8b26a6eb1780c0  
f45c1a6eabb31406f79d0e9a040bb32d  
f3ec363e81f5a2a931ccc53ab143779a  
f28cceedec95c1fed73b984af64c6a10  
f3c611e4d8a1f581c119b479a7c024a0  
f449ba5df9d0b2db22791e8e9dfbf227  
f40fc3e4b3f873f0e3fa6c56004a6bf0  
f30234e67ba0b9a518babf5aae828f60  
f48964c28a43be8ff0fcf0703b949c4b  
f3b6168145a9c5591682924c37c5cee5  
f34be50a933698908787b4313f3375a0  
f491eebb88c9879f068c99bd322629ce  
f331e121ab2d544765411b66ca29dd40  
f45fe5cddd7db8f8ac284487d8fc6e53  
f32a81a14399cff31e4a9abc2db3eb85  
f23a260dcd05bdb70673f526fc2543cf  
f3f0a7e12c0eced8c251686e6679ca37  
f4a0e3f6fb3e5612c42bd97916327aba  
f477330133a70f2049d1ea12c6f6d867  
f43a47927e5171a2460eca2ead4d2a40

f38f7b89ac060a95fd5764741ad89ec0  
f47286266a21cb890a4cd4277fbe7fd1  
f42b7452a9db91c24a08fd90a8f75716  
f23225aa1d1570eee17f0dcf64024c30  
f3af4fed1476a12868abb8031b2666b0  
f3e2e34195bef49b2398d305339963ab  
f428d83af99e67a5b403ecf8e43c0019  
f299cf006204eff29e4b9a4a2c78db60  
f2b7ec82956d51128abc9fe282ee6eb0  
f487c789c6e0d4b0df066702164b4350  
f4352f9bfd54d602129cbfd844143ee1  
f433dcda5cb9938d8eac971ff224e786  
f3390d55ada99b4bd06cbbeef651c70  
f480c7423cc9759f7271add613350bd5  
f44c5566a30260e864fb496abc3abf56  
f44f8adc47744e487cbb9db3030a5c13  
f3b03c25e1a53168a606732fc96707e3  
f3f98c5c39da10ff63c703e6ed281616  
f358fddb6d3042ee2e2f9ebf61cb8890  
f470f712ded91df16fa2f3253aa16df2  
f2c9e2e423fd91e8ee7822b35f667710  
f497d7d9b6a833d4d2f2b0ad72296c41  
f43e02344bd6dba9d2ad775b8d0a96bb  
f448a906cc9906b8f7589b117a079280  
f4a59180bc7261cab39363bd33506454  
f4a1ad13175ddf3d86eac0c438fd4ee5  
f4034399d62e4c433893f073b6520a23  
f3b7aed50f057915985e78a0503a15d1  
7c137f8592a61350c6af45d1773cdaae  
f46950f92c6c113eb9edc0d969604450  
f3ded5fb7b5997e077e32b2b50dd2578  
f44d033dfa3550e4163495445d8a7eb0  
f3baa4bbd521ac7a6dd3b22fd57656d0  
f27fa3b4534558f2b6c3f3750770cc40  
f3da16bc98e33341fac68bbc540c6ae0  
f3b8bf49e7f3a3b7d73d26d6d043b580  
f29225d310da6dbba0b16092f1c4b0b0  
f3dcaabc5ab1a820f1b207fc6bflca40  
f4112f916d3a29aa7cc2a2defc01b980  
2f00898f06ae5278f7bbb3b447fe0a50  
f46b5ef3e1c6fe35f59cf35ea4d41210  
f2ec3cbe4d3840b9b11d3b4052ee2dc7  
f41c25277982c0aceb1d0d4bce89f6a8  
f496a8f5c5247ecc826434d7c86d1d6a

f2af5c7a4c14b30e20dfde6a7872c608  
f455341e5e78b61925efeb8cbcd90180  
f418b93a5d0e1d05fe68cbd546a37fb0  
f3e8180014be44d40ecdb03a85d19330  
f3f8843d6ac8c5629ccd8e248767352e  
f4538145ca1b6706ce9d814e0dbd3190  
f3fd889f9e614478649fb2b15bdb3b40  
8a8084a45b41049718de211373f7f19c  
f46aa7dbf77c4bbaf472105d68a164f0  
f4596068b7bd4dad1c2f2c57c7570bc6  
f3aad7f6ef56c9a2343b43dcbaefb520  
f2d65020a781787a6db9d0d358ff72b0  
f22e6ecaa5c4229e76d458b0666e6c86  
f3e89ee6f16b6a69d2bdceeeee089dd0  
f3f1c85d755747fc159fdf3ce64b8242  
f4958efe76e0fd559a51bcedd8c6bde3  
f3f47cdbe4f12fab714f8820dae1e210  
f479c70c2528b6021b280199c40e7d43  
f405f4bf972d908debe87f30ff81aa90  
f3d54ede291f4d30e0103a2bc347b630  
f42524297dc707b3a4047a8df4e4d14d  
f253642845a2b26d4ce8534c7f794e5a  
f44916e566f94c6de13fa104cc2097de  
f3cf031dd08eae286bb98235b6653d06  
f3afb612c39e3ce215edd27944f26b17  
f4a3ec35a431bbcdad536e86124b82ec1  
f4963cfae82ed3ad41fee5efda8e8a06  
f3af6354ea9affb8101ea67c0c5cc5fa  
f3f5634f01e374c613d370af4e816950  
f48a9fcf5b16dbca76dd09ad9c314299  
f46defe092c29998b895788175cbc640  
f40b03bc5d87dd506302aeca3393908f  
f2d127d082c59572598d92153ebcc380  
f3a9b97f92d8434f8d29a1d249ede8b3  
f3f347604af1eb5842d8255bfbab8470  
f43daf56e9ecbac9fded60ab9170a930  
f4a0afdab5c4c493aef772b8a742ed7e  
f34948b1fa4cceac127fab8708863fd8  
f29d293c30a97e0b5abd7c9b8ff1a60e  
f437c90f3d263a172716061defd7e5a7  
69d023044146e099e88b49abb6e88cfd  
f279445475579a7325252b24f45c5740  
f47236cb798f3a15604bd608c3002230  
f4a5d83e2412ea844e52b8c8009836f0

eb935ecee39dfeebd3c7601bcd62e0f3  
f4358da791c0ca1c238bde83ac900564  
f47dfa076c2bdd07d90d059b93762c4d  
f3db366f09dd71f0fb545c7c8169bbd0  
f259c4796c9d444ebf88d3bb1ba8e8d4  
f403ca63217fc8a613aef671a8f631e0  
f3d72951a2210b8826890013903c5b90  
f49865cbd12b8bef2ab5ad8422f1a2e0  
f4707325c5fecc50d315ee4d4315ab50  
f43a4e938b0289b2576bb4a014a55f44  
f4575e58aa453047886a8a112f0a65a0  
f3ce28669075f9ecb1205ee664632270  
f319792eb033e525281ceb62810c1ac0  
f423d2d6bf30eabb0b70c434e5d248e0  
f46355e372b52d64394be3d956949930  
f430b324e0573461010b686bc5c549b0  
f472a3819fbde0fb0738e6001eec9530  
5c8dd4561380ba1d7e6f8a03e4279530  
f3fbeb3e4d4aaa46d65c377683330db  
f46c6ea1cab08c943f7d7de22e288233  
f470378b7dfdc82ef7d6931c79dd8afb  
f40e83bffb599273523cb180278a0420  
f44e3f67550acbd82e45a3054369c50  
f4519f8190c2971caa15fc81c3181f43  
f44fd790fc1e89980806fec15f630050  
f29312a982dd36da2c7e3fc6bc1b3b3e  
f408375532285157e3bb10fa956f09d0  
f493976975bcbe8d3c9f497e560d4b0  
f377d92c20eebc0e94b8bde6bb59de94  
f497025ce7b33de44357ec252d8a95e6  
f2c6a6541976bab117d03f7a8c2ccb7  
f3e543b0dd5bfcde388807905aa66140  
f4619f4f28e65fa24e2dc50acb1e5e97  
f3e0bef21656af4bb5cebaca80b45e50  
f469a449a3da0992ec2c21181b046d40  
f33aa2726467e6359b48ed0017ad09e0  
f47864d73bdd1c115f45efb1a12b2b50  
f485d54d28f3d47d0b21e016b7695760  
f4474ad4afa3e68813abf40a078829c0  
f3c5fc158af02d37fc174e52ebcdcd60  
f3ebfc91064a60d76a3943603d1d6b2f  
f3f33394d57f6379b1e7d9b046f61bf5  
f3b66f7572ae2353d4fdd879c3f27cf0  
f4a5b9982cb0a955884aff6281ffaaf8

f3424d7ca903c0954d78c11717ba2b91  
f45054aec66e914860d3c46b5010321f  
6d9101aab92ccce828003d4a88103a0a  
f418fc5247fb100ef3757c56666b37fa  
f323a7f7c82a42a805a28711ff562312  
f3b08f1037407d406b44c21e75d71dfd  
f3e9bdd0737ae573b62f6c1604f9de5a  
f454b00802e9645bdfd2889ec171bb50  
f460f28c7517d02a5b6d052224676b70  
f2e28e0f621a468519b155028252e980  
2a62d68950a01605e8e2ae7c7515d7e6  
f27759818d06e3052718250bf70e9170  
f3e276eb3120a2189ce6bb0d8c9bb5c0  
f3f19a293c0d371ecb7a275a9c9b3837  
f4221d914840e3798393040f15f3dc90  
f4a5a476ec4225cf1e8e94bd63d83020  
f3ecdabb21c8165eb10f3c83ee3f8a063  
f49ab736eff17bd1819f9bd13d065d28  
f460a0e2b40fb279752291384cb6c61b  
f249a4f87bf03e72694972aa663b76ce  
857c7d8d02649465d9b3fe4605140289  
f3d73dadbb26c92a4442bbadeb2fec20  
f4399d14b1be97157ddcd113f1e648dd  
f3f929d9f4d12cb7173cc474293526a8  
f453b195713848f75db00cb9b7ce9d50  
ae33a2ba961748a38ecd936ab72a63b4  
f3e3b49f4f11d894c906f98ba058f150  
f3e28d1c7f6d002135167b0da240d708  
f271a1645c562575412fa25a09b47794  
f4718af7c20c308713190ef8e4b7a678  
f4268fe02b1fb3e3c32ef57e835db76f  
f3df5c3b7c0b0adcbbbbb32840891db50  
f3dcd3eaadcefa63cf15c2d9088cf140  
f3c0007f6d777780e3aa1775651b3fa1  
f468977e713a8bdf89085a94c83b12f0  
f490ff5223da5ba26c510c17f587c95b  
f41cb3bea7da46f58b90d65a6019dc21  
f24d4945e31e66c83c005fc28849b7f7  
f393b048ec2a2ee8dfc813a8ccd66319  
f4259449f6eb12cc82c57afd9b5fcaf0  
f29755ac052c17756c6038f30b900910  
f415139cdb8c8bf7592f2e0e71f0c4c  
f46ea35cacedcf349e76db25e229d6b0  
f43faec42c367d3c8ea3c6b193398ed0

f3e5b11582e2b5040a108f600514d6c0  
f41842927e108ff42d920fd3f7169270  
f41dc1f6566f60851569afa886acef6b  
f43e78c6007792637af7494d7cb48486  
f3f93408ccef78258930d78157551130  
f41c5f2eb4f7a04ac0c40a3175cf220  
f3e87ef00c75cf09411e24f041735137  
f493d91c158e0491468b8658f1fce4e0  
f46faef4f3aa1f13bb09a544e350ffc0  
f331013c7f43dea57b2237db59ec6150  
f3e11bcc2e8fba5c79f021ee68981c8f  
f3e69b18bef8f61ff590e579e98151b0  
f21e0a3120f3c8bf8108a79b5184833b  
f4a1586a15413b80d4e218bbc864cb70  
f3ed388cfcf459261f4213db8130a51d  
f3d06eb2883af23b4f7c4cf70b6f23a0  
f46c16580c07707cdd87567652fd9776  
f3e2b5a75754334dcb52856340d42d0b  
f467e9e12d5622c8bba2ebafa05c891b  
f484eb958f553ea0bfadfa113df58a3d  
f2b98ad0b59f5f460c831c03b869efb0  
f24cb950aa6c0d27261d77118068732b  
f3b4c2dd7ccdfa916dbd9f27f49b4180  
f3ea0f6cef3eaa991201f9ab12bf8480  
f432345b940036a7f7dbc9f666a0bebf  
f450aa3aaeab60b125b8838dfaf50aa7  
f445e0be64cf85567be66c22d5706fba  
f47a3f6f83abeaa961fd4e8fd68290c0  
f463d5231398d6bed66795f24fbfc6a0  
f365c4d8afdac1462d7041838e19fdd3  
f3e67161d73c4441ecd5a6db6ef666a0  
f232b059efb386cca5f709e64a850df6  
f469546de40d8f1dc8483b7b32c1917e  
f419c86d962c2b4f5c7932a7b5e523e0  
f31d2eed67ec734e269a4602e454d190  
f45b567eab53919a1b29ad36a55d43d0  
f4877f4f449dc61207545833c7ef7340  
f3c1a983e85b56ed3c7304e7446fc510  
f2ab417fc22d4a4c67575620db4bd241  
f4944cb5592986684dc24d6cb6ad4a90  
f35ec2208318b7db371bfef3237f4a40  
f4712f903d324e4777ba69e08bf3b8a0  
f2fbce27272eec683ea9865f940027e0  
f46205239c68b45dfa79f3d1c3903130

f410a921a9d675081b63de58874242e0  
f40179b86dc2f5fb558c21b4dd725ef0  
f4a7414d6fd27e9d9e558b146b73c2c0  
f23377d67d17fa6fa1faa12641dbba64  
f3a61848058d68097e7948cc3662963f  
f3b9164e08a50d992095526795c564ef  
f48adf35c2d2115a012db1102aac2400  
2586fbaaf4c53633e9f7552c21468ad6  
f3b1c9eaceacb0767734f960869ebcd0  
f427f43c6fcc50f0f26835064e38da1c  
f3b058dde5e697adb34ce71392fc60cd  
f4430edbb58e14f218b282088867b550  
f4a18733493b2f74e75ef0893bc69220  
f438e4342a5515a318152cb690b211f7  
bfac1bc94f478874b7b85289f3f92fbd  
f45df28ee47245217b6e0385e891bd3e  
f48933dd381960365663d1f1f40c8e80  
f41205186d708777decf201cf14378f4  
f3de0c90ccc57130c270d13b9c0eec88  
f46503285ab37f0aabda311ac95d2251  
f42081824be34bd0073432811418346d  
f3b35b4fdfa20e2234aedd8d3bd1bb00  
f3273586e1352c42c78dd45076cd7200  
f48490a85f474caa9fa66621704444a0  
f486b424a620940ca885903eb5f9d330  
f433be1129ff98840efa55d55ddda69f  
f442dc8612150826f62e0bfa22b8a980  
f46d52508070200202615f562b0375e0  
f465100c344cb5ee2496d96d5f846d9e  
f42cadf64e1ba7b51032009b1382ad10  
f402c11a0068a570e08d7078e6846e9a  
f47458fc455ac57d4a94d76056cab940  
f466d96c24cdc216dc776a70f3d504b0  
f462c12edde38f6914768f993a2cd3a0  
f40a81f5350f4f33a300c2ceb98ed8e2  
f49ad49163233a402772f77c97188a23  
f3c3695d49b50e2fb27b370759378950  
f438e9c96c887a2cf19db4bc93f90620  
f467c62792c4b50f20fbee3f2d3af015  
f3c85efd212e3796407a55acf5067a8b  
f4b0a43864fc5102feeb9850a1746d91  
f2a9b9092ea1700586ed0d8d20dafabd  
f40807d43e87632ed68605ad605ae8c0  
f312721b2636735bab7767edd8b2f894

f412972bd64475f1cc5e7f3a3dbad5d2  
f2fea6c855e3824aa6109b0d5655a900  
f45a363a4e2477caa5ba8743afe8e601  
f4a44ef0815a39119461e08c678a9b7b  
f34d51b4dda0eca762abda0215ffd401  
f3e510c904ae565e612ba35452c32650  
f40db30bff91b59367bee518616828b4  
f4404a5600f245b9dbc8c0284c3a6920  
f411c37f962f185ed8bb1f27670f3c90  
f3cbd0045a27c7736f78788c2321d66c  
f45f8c9f37fe955532a1095fb75b2c86  
f454307892e3610980ca896380229330  
f3f9fb58c4096be9539a1a45b0906f20  
f37aee7e437c246eca566f51fc7afc7a  
f46fe025f4d8ac7c45c899276e8940b8  
f48eb886de33805531e9035b31c6bf5f  
f30417b8d200fa25c8f8fc80ec67d498  
f2ab64bd50ca16012840207b45577dc9  
f4ae72424ea6060aef088d943ea7d791  
f3f5868a857c8ed3bf960cf319c2c360  
f4903d1a2592b17aa96ae3b598298504  
f24b4469d6205aedb908f8b25e36147d  
f495b88490063dd63be14d1833d122d7  
f3b5ed1ed159418b260dfdc9020f294e  
f4155618012f8c5c39fa191614fde5b0  
f4a346cab0293bb92074c98b33251485  
f2934e0a8eca47ca9335925bbe215c80  
f493239d811c69c454d7154645dafd60  
f3dd474985be02708b7169f59beb6153  
f40441aef9c7e07d89c664a5180edb40  
f3709b86e76f7997993dd79370db5d5d  
f248b1ba7a4e71afd4014238951fcd67  
f2c5534fdb8b45cad26e6bebf0cc8f56  
f37365fe6acdf3bad46e8066afffea14  
f4929d6547aa5c34b04b319ec80cbfc0  
f3da542084e07a848863bb4ee95016a0  
dca9f40719874973f212abffec9b9169  
f239ba7ac7a3e432d5455f84db5f1bb0  
f267b9abb3025639b7980c7ec71b2c70  
f3c329b42a3dfe87d99749180ec5aeaa  
f472c9de5dc094ed248e9e08b0d107b0  
f2b720195029c5aa90862d90afbc72d0  
f45c13609f9e5d168a58f87f96747c1c  
f3e05c2aefbbbeafb1e30486531528b0



f3ce7748179080cd4f8e8b1d03d320c0  
f43066080287d7fb1a1b476d0b4c80d0  
f257d63b48fac99e391692bdf9912730  
f413a033b65268a0fd6cc75a534ca9a0  
f48d8f41a27aab649452323a8bcc043a  
f46c84ff7d9e9dc1b12d4ae509895ea0  
f3bd391e1fdc384a13abc2a440c59899  
f2f221852ac049f7aa3294697dff6854  
f4483ea3819d2036f907b6b1b88fa23d  
f4211afa3755847373b54a019c56d5fb  
f46627d0b2386b052a13e52d2aa94c70  
f4545cea56fb4dc50606b3cb650c67e0  
f454a57798462f252d27314fa51d7ee0  
f413cd09de84f76355e32c57f4f4c0e0  
f40ff8ef12c3ccb5ab18e284b846fce0  
f29abeec226a6393a5aaf2f1acf0f50  
f311f7ad00979e2a193622e21a2007b0  
f4066ae8842589df5adf694288a82dc0  
f4916ad846f4950cc39c1cc81ecb2710  
f3d1dfcb97f82fc5b547be14ab2b6d80  
1ce293a2be7d4cc968279d23a685183e  
f3d8c2aa7caf69711d457aefec369f10  
f3dd749e7dee8b0ae15c0607b4834096  
f468e457c57896d425486570a1a21e20  
f4831ff1fc08504ed45142a3a229c490  
f29637b58a1f41f04cf34271d1a14030  
f2cb7df0ba1f9f77c51a9e6896336584  
f46fc654d1c8a1e57450414041783976  
f37ae6c2dddba12dd1c03f05aef974bc  
f3ae5f1ee125d07c78a2d3ddc4fe2b00  
f3e12778989263c774bde2337952653f  
f3bc2cac5a56d9f6c4e228dfe95f6ff0  
f38e9074052218d64939678d441edbbb  
f412fc76901e2cf243da57660485dc8b  
f3da530747d43e20ca53f9f0ac7328a0  
f47a0e168dcf2bf64495128b509cc386  
f4610a2aa2e819d4b6daece7e5a1893  
f47fbd555167925c19e847f3149d321b  
f3d973325d58618ae557eff51008c3d0  
f47a95927a4653d012020c19c5flaf20  
f32d8e4c1ee3c8e1394381935d27e1d0  
f45c74a112e25e0d1585e82cae0dec60  
f41c1cf5b93ded6be6be80ee9941e0  
f3e9320b10b62b92c1708beaca9ce063

f4776619f195892713404216e45ed7f0  
f3d0fd6de308b0f1c7f90fdda46df680  
f48832a70dc1200a9ff5c315566852f0  
f460f1d1f13f31f45c2861d6c1933190  
f2b8d02db1b2441b3758caf9d524e703  
f424ad4d86d7eac0f8eb03fa08661a8b  
f252fa57672e3055ad2688da277b85d8  
f355c3002290c456d1c28e43d4e98af0  
f3e3e44a0c738b52fba3985645225ec0  
f25fc1f38c31b81096a2cb01d7b7512e  
f492271911e1218083b69f918d5e0f75  
f4a79ef8ee592edbf45871b24538f1d0  
f1fbca019f040dbd4f23a0a4a5282a90  
f3fd3fda34ec8dba48fb25c0883e1323  
f3d3a9cddb62f8d9bb5e15eaa414597d  
f3c0a94db400c33d7c9d63ee677e6600  
f22d702c0b761da431c1299b64d3eb50  
f261ad6952041851e1109074d4feb890  
f3e878f52ef37f8efc20a5dbebd3d280  
f38547812049726b594fae39a8f86607  
f414312a68aa5737448db0f09b651dd3  
f3a882c3a0640d7024e6909fb98da800  
f4755bbd4995ba4ae127edb54d12af91  
f4418ff238c174afe05679392d53b150  
f26e68fd4fe0c24d3b83c7530d9f91b0  
f3d5e1d9056c29e84b38a5ead14aac25  
f3c89dcee0cb5b3fe2ca22d56d6d7d7a  
f43f73496638dc4b2df3b5194443bb10  
f31b51aa17c2d388668071843dea14ca  
f3d7ffcbe5437993d3099fa2db75908d  
f3acbe635d24862bac29b95955804390  
f3b947d0ebb86727a86e757fea3c6313  
f319b32dda01bc05d88ee0c20e9eeb38  
f41f4da4569a2bad1d6c5b469efc5970  
f426255d77b08dd058e7630a6ac1d6cb  
f49d3e8d09a969a2712fd131136ad7f6  
f430db465d6eaaccb71651ec7d43954e  
f45feba1d77beeac8f1fdeccfb750a0d  
f44a90bbe4c08aa9fc0a485a0392c5cf  
f3bf86d7bc41d4ed68e31f3552856448  
f3c996629dfd9f5cc2defd589bd99e60  
f3c2e788f7b734a65a2647b33eaa34f8  
f4af2bc643778f68e533e071938571a0  
f43ece079d48f5a9cf23e9e8a7159870

f48ed2699d922a44716cf843bbea856e  
f43984240ef51ffdd03f907d90ca9c0  
f3f56c5c328a62c67e04ce9615ddff82  
f30bbd5f5d5bff051ff7707196f71056  
f4a2174d9957be015288d94fef0e6b9d  
f415a171af144c5050683d38211f2650  
f2c30ea22a952aebc0d7b653e4419050  
f3b9bba4356b0bee6e02d45fc2b02b10  
f4884f2776ceba795e769f1ecad965d0  
f3e3d2d9944df0bf5a1f4ae14fe4b5e9  
f44add8223bed8a9e7ed6eb3dd2163c0  
f4070cac3ee6b4f08bfb1ba0ad55ee55  
f43bf52c43279f39818d7937113419a0  
f22fb1210f161f0a2e8a122020024f30  
f2b0f3916a2a259592dd73efda44e670  
f40134268bc4186aa8322f389e850dc7  
f3cd55f869bd709b485a0a09adbb3415  
f298277ef7327492aeac9314570b8146  
f2e4438d6b55554845542c9707355c4b  
f43d23216b2f3e9ac738e11680531dd7  
f4a42d6f73c4629b62ab16b58707dd60  
f3d7196ea748bdef38abd880c33a8a30  
f476ace04091ad0f178b8078bcc31feb  
f3ac777da021ee277c4a76b96811190f  
f3fb166fb6d45ec420ff16fa08fd4960  
f3ccbe3a442788e275233930adfa3820  
f45ee49cdf2be3fd913881bd34879020  
f36f342985b8c58f92925a32f19feb13  
f48dffdf557b860a76dd8c30baaf31d5  
f39afd5082e0c4f6240991e126012b20  
f2357a6aafbe05ce761009a933a6aafc  
f4380833071a94c96628a3e4dd4d8160  
f3c6372f9c95ba38d72a5c2219ce9f8b  
f30c3d6774aa8a2fa49335c4d752ecc0  
f46713c57faf9ce6027c0032b4a98510  
f3c0cbe39f74a2cfeeffe38c4494a4e0  
f47e0dcb35562a1de7e889d302ca588d  
f3cee489d29655b23dc86cf0b4a5e590  
f3c72bed198503871c69bbf672301c56  
f3ddcefb688f0c3b6b0cd52612b37a80  
f44cb4e26792831c9b9fa3db85c173b9  
f3e7b0f6978b9fd90d87124f024f2b30  
f433b57bbeec604bb48b411d14a353c4  
f45517505ef6655aa74d7952b8b5fcbe

f48f492cbe03083f358cdf928b528e5f  
f34e5f915c9fb8268716040953cce5e0  
f40e31ee0868f54541cf570464281b30  
f4af319733cf1bcb0144625d9861dea0  
f44560be5990d3c19c30886c1847b0e2  
f3b184cf926e2363c5e6b776c008a6c0  
f41ea717c9ed38cad14129cbdc8b86d50  
f3fe3a94311b369786f23be595cffa20  
f39acadcfb5ef01ebe4f61ea19100160  
f461f6c5e42b759eb712803173f81750  
f401cba5b46f83ef7c6b110bff55e9ca  
f348484979b94d7e2ff3a642c7767520  
f3b77e522f094daa9fd37198533a1dd0  
f34560859fa3f47677d078373fa8c3d0  
f45c66a6ef489167f2daef3bc58120d0  
f36143b7b55789222ceb3c74e17e6070  
f446efb33a80db02d3a0f63b906b9f30  
f44a402ae2c8763b6b9d28b5f8014fa0  
f4818c03b90c0ae3cdebc501a49ddc63  
f3aa8f4ffcd4c35e0ceeadfeaa01cea  
f4667b05d230d5d811ccc16e096533c0  
f3d4b9a9f40a29685c3fe4e515fdfcc0  
f40e0e86a1afde7f8e544fb025e84f10  
f4807fe717fffd9f7c2d0f8c50d34a9a  
f48ead48f6f3655a495f51aa52ce1cc0  
f23a807dc269af11127ec9ee4f0fd098  
f3b7a48f4c1e9086b68650060b5f91d7  
f44e4e394290e78dfce91fda28a6b0b0  
f38f456b41844ddf76a1d0b44bf638f9  
f3caafb0332955ff9d8461aec0e1013c  
f2a578de5d444c2b4bc7dfda13844bda  
f2b0812f63dfa23094dd0668707e7357  
f440672e41131ad735a703034c8e8d90  
f3e796f02109f27ac646625601e81930  
f47e002ee5a269c19cd0c02040812b84  
f3fe931e8d267ff115361700aab71dd0  
f443b2cf5ef896fc6f62d29cfe17992d  
f42328940508ec6f436cfecdbfd18eb0  
f4894edb49df36460b3447922372f640  
f49a0526d35c515c94c0512b8d79b9e0  
f40db0621db9ba41d839a10a6fdd7a00  
f3fc8e8fd5a088fb936f4d48290a2110  
f21c23ddbea4d65e525a7a3a0d0e73d1  
f3b4061d126230dd1b4097da85e970d4

f3506c4945cda38b296fc15adcb45bb7  
f4b0887e47a1b436ec7eb9b4df59b220  
f3b3b8f5f697f9d5b0598bee33f92282  
8ff422cb9168ca61377a75c193419b77  
5ba10841c5cc6d92bf27fb98d7893f6e  
0c6c9eed0dd068ac6335793bbb089119  
176aa1e6cbc4469da00587fdc8d16cbe  
f3fa8420e1ccee6fb90ed2c94d9a30e0  
139a7f70d8931796acb2825f77d90e43  
b7247cada0911e6d1b66beabe7d71711  
263b0c00b2e33fd8427c50242a92b104  
f3c6202e99b8ef0336da5c7a7c922ba0  
f410f4147ef4241d9832d21167273500  
f3bff8d63416fcf543ad993db65990f0  
f3d8d1771cea7a8f8dfdc0f148e579e0  
f225ee1d10a671d03a47c96c7fd157f0  
f4405660ebb0b2de5c1a4225ba80a830  
f49150c1af438c1327afa4b9fb1473a0  
f49f84a47a352c8195e126c988bd5f30  
f26668d72fdade11de8755b91e862d20  
f3db8ad737dd5bc43c739af4ab609b50  
f3a5d0a779a36cf15063c0765044e360  
f3bd9fb7d95b47de4e6bb6e3b99fb810  
f44b0ddf6241b05f5fc27a8d0d2570f0  
f45cfadc0dfc3ae2220a2f0cc6917614  
f430bd183d5fc94097d822849539ca9f  
f428a2b58252b98f0bc02b376d4eef24  
f484d385b503e02ed31a816c31048510  
f3fc07314ce4353951464bf7c0bb2ddd  
f4598c361ddca9360172a02383830090  
f49f19032c9e671b8ce24fc2a6c141c0  
f3dcf32fd508d637701e11c9735b6100  
f21ead451be0b9d65d037a7a4f597440  
f4aac4ae8e89c7e1b9f82d858b860c30  
f4a5aaa8b375d4698bb9fdc50052ae70  
f4aab3bf4b7ee8ada7c5a8afac0f5fd0  
f27e4b3e0506a6559a494a5f203fe540  
f31cb7be94c4cec9e8c0e5acedf1e7f0  
f3da005393f9a23573fc5b2aec957330  
f3c62095212ece7412b2f89db1ed66b0  
f4160cf3ef80395876d1a5d434cfe1e0  
f43eaa047865b8cf15fed6748fd6fe78  
f42c9ebe06c7e1f307fa91d68ffa64f0  
f45f7d2e49b5bddca79e75413641ce60

f49cc883946d40510c0756ec93e16cc0  
f459cef09e501765ae2acd2cbdd18ec0  
f454ebc2e39bb3efad85dfc9542f0e00  
f3d8868b0a7d11726da8acd2f714ba60  
f41b36c1a9a14ceabcb4fcfa1c4b1e90  
f37306698784d2db477f2b171065a1d3  
f3e842e2be173c4eb5fb1ffaadc22a26  
f3f0e85a89f46b4c03b26adca3cbcdc0  
f3f8ce23fb900fc41f716a2539dfac60  
f28a3c252a7ce032480a9b97fe2fea10  
f3bfb733e93fb6e971aec2e482bdefd0  
f4ac6761d66cbd803d464aacf4fd3d44  
f3aac1cefab56bb2424d436d8e369140  
f38dfe652f65ce3587a9947398647ed8  
f3f1ce85aef1ba8604dfa71e11f00690  
f45c04764c9079887a9fcbde7d0d7950  
f265d73992afc374ea51a8bc88106450  
f4051811026a4f7f6176ebbc9f95bea0  
f499efb0831f37a223c1aede54aae350  
f29135daa39e49bc76357fba2d14343f  
f4af41e7028bf97f67b936b7543eff90  
f3ba10b883b5fb4e957ed46d2e408700  
f40dd6c33483ad7f0529489f5ff32c90
